# Supplementary material for: Treatment of decentered developmental dysplasia of the hip under the age of 1 year: an evidence-based clinical practice guideline - Part 2
Source: PubMed Central journal article supplement — EFORT Open Rev. 2022 Aug 4;7(8):542–53. doi: 10.1530/EOR-21-0126 (PMC9458947; doi:10.1530/eor-21-0126), 2022-08-04
Supplement: EOR-21-0126supplementary_table_1.pdf [file EOR-21-0126supplementary_table_1.pdf]

## Appendix

### Appendix 1. Systematic search strategies

#### Question 1

| Database                                      | Search terms                                                                                                                                                                                                                                                                                                                                                                                                                                                                                                                                                                                                                                                                                                                                                                                                                                                                                                                                                                                                                                                                                                                                                                                                                                                                                                                                                                                                                                                                                                                                                                                                                                                                                                                                                                                                                                                                                                                                                                                                                                                                                                                                                                                                                                                                                                                                              | Total |
|-----------------------------------------------|-----------------------------------------------------------------------------------------------------------------------------------------------------------------------------------------------------------------------------------------------------------------------------------------------------------------------------------------------------------------------------------------------------------------------------------------------------------------------------------------------------------------------------------------------------------------------------------------------------------------------------------------------------------------------------------------------------------------------------------------------------------------------------------------------------------------------------------------------------------------------------------------------------------------------------------------------------------------------------------------------------------------------------------------------------------------------------------------------------------------------------------------------------------------------------------------------------------------------------------------------------------------------------------------------------------------------------------------------------------------------------------------------------------------------------------------------------------------------------------------------------------------------------------------------------------------------------------------------------------------------------------------------------------------------------------------------------------------------------------------------------------------------------------------------------------------------------------------------------------------------------------------------------------------------------------------------------------------------------------------------------------------------------------------------------------------------------------------------------------------------------------------------------------------------------------------------------------------------------------------------------------------------------------------------------------------------------------------------------------|-------|
| Medline<br>(OVID)<br><br>1970 –<br>April 2019 | <p>1 "Hip Dislocation, Congenital"/ or ((hip or developmental) adj4 dysplas*).ti,ab,kw. or ((dislocation or subluxation or luxation or stable or unstable) adj3 hip).ti,ab,kw. or 'infant hip*'.ti,ab,kw. (14411)</p> <p>2 exp Infant, Newborn/ or (infant* or newborn* or neonat* or baby* or babies or postnatal).ti,ab,kw. (1029656)</p> <p>3 1 and 2 (3233)</p> <p>4 pavlik*.ti,ab,kw. (358)</p> <p>5 3 and 4 (209)</p> <p>6 limit 5 to (english language and yr="1970 -Current") (170)</p> <p>7 (exp clinical trial/ or randomized controlled trial/ or exp clinical trials as topic/ or randomized controlled trials as topic/ or Random Allocation/ or Double-Blind Method/ or Single-Blind Method/ or (clinical trial, phase i or clinical trial, phase ii or clinical trial, phase iii or clinical trial, phase iv or controlled clinical trial or randomized controlled trial or multicenter study or clinical trial).pt. or random*.ti,ab. or (clinic* adj trial*).tw. or ((singl* or doubl* or treb* or tripl*) adj (blind\$3 or mask\$3)).tw. or Placebos/ or placebo*.tw.) not (animals/ not humans/) (1850435)</p> <p>8 (meta-analysis/ or meta-analysis as topic/ or (meta adj analy\$).tw. or ((systematic* or literature) adj2 review\$1).tw. or (systematic adj overview\$1).tw. or exp "Review Literature as Topic"/ or cochrane.ab. or cochrane.jw. or embase.ab. or medline.ab. or (psychlit or psyclit).ab. or (cinahl or cinhal).ab. or cancerlit.ab. or ((selection criteria or data extraction).ab. and "review"/)) not (Comment/ or Editorial/ or Letter/ or (animals/ not humans/)) (390597)</p> <p>9 Epidemiologic studies/ or case control studies/ or exp cohort studies/ or Controlled Before-After Studies/ or Case control.tw. or (cohort adj (study or studies)).tw. or Cohort analy\$.tw. or (Follow up adj (study or studies)).tw. or (observational adj (study or studies)).tw. or Longitudinal.tw. or Retrospective*.tw. or prospective*.tw. or consecutive*.tw. or Cross sectional.tw. or Cross-sectional studies/ or historically controlled study/ or interrupted time series analysis/ (Onder exp cohort studies vallen ook longitudinale, prospectieve en retrospectieve studies) (3167404)</p> <p>10 6 and 8 (3)</p> <p>11 6 and 7 (11)</p> <p>12 6 and 9 (93)</p> <p>13 10 or 11 or 12 (97)</p> <p>= 97</p> | 132   |
| Embase<br>(Elsevier)                          | <p>('developmental dysplasia of the hip'/exp OR (('hip dysplasia'/exp OR (((hip OR developmental) NEAR/4 dysplas*):ab,ti) OR (((dislocation OR subluxation OR luxation OR stable OR unstable) NEAR/3 hip):ab,ti)) AND ('newborn'/exp OR 'infant'/exp OR infant*:ab,ti OR newborn*:ab,ti OR neonat*:ab,ti OR baby*:ab,ti OR babies:ab,ti OR postnatal:ab,ti)) OR 'infant hip*':ab,ti)</p> <p>AND ('pavlik harness'/exp OR pavlik:ab,ti)</p> <p>AND (english)/lim AND (1970-2019)/py NOT 'conference abstract':it</p> <p><i>Used filters:</i></p> <p><u>Systematic reviews:</u> ('meta analysis'/de OR cochrane:ab OR embase:ab OR psycinfo:ab OR cinahl:ab OR medline:ab OR ((systematic NEAR/1 (review OR overview)):ab,ti) OR ((meta NEAR/1 analy*):ab,ti) OR metaanalys*:ab,ti OR 'data extraction':ab OR cochrane:jt OR 'systematic review'/de) NOT (('animal experiment'/exp OR 'animal model'/exp OR 'nonhuman'/exp) NOT 'human'/exp)</p> <p><u>RCT's:</u> ('clinical trial'/exp OR 'randomization'/exp OR 'single blind procedure'/exp OR 'double blind procedure'/exp OR 'crossover procedure'/exp OR 'placebo'/exp OR 'prospective study'/exp OR rct:ab,ti OR random*:ab,ti OR 'single blind':ab,ti OR 'randomised controlled trial':ab,ti OR 'randomized controlled trial'/exp OR placebo*:ab,ti) NOT 'conference abstract':it</p>                                                                                                                                                                                                                                                                                                                                                                                                                                                                                                                                                                                                                                                                                                                                                                                                                                                                                                                                                                                                               |       |

|  |                                                                                                                                                                                                                                                                                                                                                                                                                                                                                                                                                                                                                                                  |  |
|--|--------------------------------------------------------------------------------------------------------------------------------------------------------------------------------------------------------------------------------------------------------------------------------------------------------------------------------------------------------------------------------------------------------------------------------------------------------------------------------------------------------------------------------------------------------------------------------------------------------------------------------------------------|--|
|  | <p><i>Observational studies:</i> 'major clinical study'/exp OR 'clinical study'/de OR 'case control study'/de OR 'family study'/de OR 'longitudinal study'/de OR 'retrospective study'/de OR ('prospective study'/de NOT 'randomized controlled trial'/de) OR 'cohort analysis'/de OR ((cohort NEAR/1 (study OR studies)):ab,ti) OR (case:ab,ti AND ((control NEAR/1 (study OR studies)):ab,ti)) OR (follow:ab,ti AND ((up NEAR/1 (study OR studies)):ab,ti)) OR ((observational NEAR/1 (study OR studies)):ab,ti) OR ((epidemiologic NEAR/1 (study OR studies)):ab,ti) OR (('cross sectional' NEAR/1 (study OR studies)):ab,ti)</p> <p>= 96</p> |  |
|--|--------------------------------------------------------------------------------------------------------------------------------------------------------------------------------------------------------------------------------------------------------------------------------------------------------------------------------------------------------------------------------------------------------------------------------------------------------------------------------------------------------------------------------------------------------------------------------------------------------------------------------------------------|--|

Question 2

| Database                                | Search terms                                                                                                                                                                                                                                                                                                                                                                                                                                                                                                                                                                                                                                                                                                                                                                                                                                                                                                                                                                                                                                                                                                                                                                                                                                                                                                                                                                                                                                                                                                                                                                                                                                                                                                                                                                                                                                                                                                                                                                                                                                                                                                                                                                                                                                                                                                                                                                                                                                                         | Total |
|-----------------------------------------|----------------------------------------------------------------------------------------------------------------------------------------------------------------------------------------------------------------------------------------------------------------------------------------------------------------------------------------------------------------------------------------------------------------------------------------------------------------------------------------------------------------------------------------------------------------------------------------------------------------------------------------------------------------------------------------------------------------------------------------------------------------------------------------------------------------------------------------------------------------------------------------------------------------------------------------------------------------------------------------------------------------------------------------------------------------------------------------------------------------------------------------------------------------------------------------------------------------------------------------------------------------------------------------------------------------------------------------------------------------------------------------------------------------------------------------------------------------------------------------------------------------------------------------------------------------------------------------------------------------------------------------------------------------------------------------------------------------------------------------------------------------------------------------------------------------------------------------------------------------------------------------------------------------------------------------------------------------------------------------------------------------------------------------------------------------------------------------------------------------------------------------------------------------------------------------------------------------------------------------------------------------------------------------------------------------------------------------------------------------------------------------------------------------------------------------------------------------------|-------|
| Medline (OVID)<br><br>1946 – April 2019 | <p>1 "Hip Dislocation, Congenital"/ or ((hip or developmental) adj4 dysplas*).ti,ab,kw. or ((dislocation or subluxation or luxation or stable or unstable) adj3 hip).ti,ab,kw. or 'infant hip*.ti,ab,kw. (14411)</p> <p>2 exp Infant, Newborn/ or Child, Preschool/ or (infant* or newborn* or neonat* or baby* or babies or postnatal).ti,ab,kw. (1707534)</p> <p>3 1 and 2 (5388)</p> <p>4 exp Tenotomy/ or (adductor* adj3 tenotom*).ti,ab,kw. or psoas.ti,ab,kw. or ((surgical or percutaneous) adj3 lengthening).ti,ab,kw. (6357)</p> <p>5 3 and 4 (68)</p> <p>6 limit 5 to english language (54)</p> <p>7 (exp clinical trial/ or randomized controlled trial/ or exp clinical trials as topic/ or randomized controlled trials as topic/ or Random Allocation/ or Double-Blind Method/ or Single-Blind Method/ or (clinical trial, phase i or clinical trial, phase ii or clinical trial, phase iii or clinical trial, phase iv or controlled clinical trial or randomized controlled trial or multicenter study or clinical trial).pt. or random*.ti,ab. or (clinic* adj trial*).tw. or ((singl* or doubl* or treb* or tripl*) adj (blind\$3 or mask\$3)).tw. or Placebos/ or placebo*.tw.) not (animals/ not humans/) (1850435)</p> <p>8 (meta-analysis/ or meta-analysis as topic/ or (meta adj analy\$).tw. or ((systematic* or literature) adj2 review\$1).tw. or (systematic adj overview\$1).tw. or exp "Review Literature as Topic"/ or cochrane.ab. or cochrane.jw. or embase.ab. or medline.ab. or (psychlit or psychlit).ab. or (cinahl or cinhal).ab. or cancerlit.ab. or ((selection criteria or data extraction).ab. and "review"/)) not (Comment/ or Editorial/ or Letter/ or (animals/ not humans/)) (390597)</p> <p>9 Epidemiologic studies/ or case control studies/ or exp cohort studies/ or Controlled Before-After Studies/ or Case control.tw. or (cohort adj (study or studies)).tw. or Cohort analy\$.tw. or (Follow up adj (study or studies)).tw. or (observational adj (study or studies)).tw. or Longitudinal.tw. or Retrospective*.tw. or prospective*.tw. or consecutive*.tw. or Cross sectional.tw. or Cross-sectional studies/ or historically controlled study/ or interrupted time series analysis/ (Onder exp cohort studies vallen ook longitudinale, prospectieve en retrospectieve studies) (3167404)</p> <p>10 6 and 8 (0)</p> <p>11 6 and 7 (2)</p> <p>12 6 and 9 (34)</p> <p>13 10 or 11 or 12 (34)</p> <p>= 34</p> | 41    |
| Embase (Elsevier)                       | <p>('developmental dysplasia of the hip'/exp OR (('hip dysplasia'/exp OR (((hip OR developmental) NEAR/4 dysplas*):ab,ti) OR (((dislocation OR subluxation OR luxation OR stable OR unstable) NEAR/3 hip):ab,ti)) AND ('newborn'/exp OR 'infant'/exp OR infant*:ab,ti OR newborn*:ab,ti OR neonat*:ab,ti OR baby*:ab,ti OR babies:ab,ti OR postnatal:ab,ti)) OR 'infant hip*':ab,ti)</p> <p>AND ('adductor tenotomy'/exp OR 'tenotomy'/exp/mj OR ((adductor NEAR/3 tenotom*):ab,ti) OR psoas:ab,ti OR (((surgical OR percutaneous) NEAR/3 lengthening):ab,ti))</p> <p>AND (english)/lim NOT 'conference abstract':it</p> <p><i>Used filters:</i><br/><i>Systematic reviews:</i> ('meta analysis'/de OR cochrane:ab OR embase:ab OR psycinfo:ab OR cinahl:ab OR medline:ab OR ((systematic NEAR/1 (review OR overview)):ab,ti) OR ((meta NEAR/1 analy*):ab,ti) OR metaanalys*:ab,ti OR 'data extraction':ab OR cochrane:jt OR 'systematic review'/de) NOT (('animal experiment'/exp OR 'animal model'/exp OR 'nonhuman'/exp) NOT 'human'/exp)</p>                                                                                                                                                                                                                                                                                                                                                                                                                                                                                                                                                                                                                                                                                                                                                                                                                                                                                                                                                                                                                                                                                                                                                                                                                                                                                                                                                                                                                     |       |

|  |                                                                                                                                                                                                                                                                                                                                                                                                                                                                                                                                                                                                                                                                                                                                                                                                                                                                                                                                                                                                                                   |  |
|--|-----------------------------------------------------------------------------------------------------------------------------------------------------------------------------------------------------------------------------------------------------------------------------------------------------------------------------------------------------------------------------------------------------------------------------------------------------------------------------------------------------------------------------------------------------------------------------------------------------------------------------------------------------------------------------------------------------------------------------------------------------------------------------------------------------------------------------------------------------------------------------------------------------------------------------------------------------------------------------------------------------------------------------------|--|
|  | <p><u>RCT's:</u> ('clinical trial'/exp OR 'randomization'/exp OR 'single blind procedure'/exp OR 'double blind procedure'/exp OR 'crossover procedure'/exp OR 'placebo'/exp OR 'prospective study'/exp OR rct:ab,ti OR random*:ab,ti OR 'single blind':ab,ti OR 'randomised controlled trial':ab,ti OR 'randomized controlled trial'/exp OR placebo*:ab,ti) NOT 'conference abstract':it</p> <p><u>Observational studies:</u> 'major clinical study'/exp OR 'clinical study'/de OR 'case control study'/de OR 'family study'/de OR 'longitudinal study'/de OR 'retrospective study'/de OR ('prospective study'/de NOT 'randomized controlled trial'/de) OR 'cohort analysis'/de OR ((cohort NEAR/1 (study OR studies)):ab,ti) OR (case:ab,ti AND ((control NEAR/1 (study OR studies)):ab,ti)) OR (follow:ab,ti AND ((up NEAR/1 (study OR studies)):ab,ti)) OR ((observational NEAR/1 (study OR studies)):ab,ti) OR ((epidemiologic NEAR/1 (study OR studies)):ab,ti) OR (('cross sectional' NEAR/1 (study OR studies)):ab,ti)</p> |  |
|  | = 17                                                                                                                                                                                                                                                                                                                                                                                                                                                                                                                                                                                                                                                                                                                                                                                                                                                                                                                                                                                                                              |  |

Question 3.

| Database                                | Search terms                                                                                                                                                                                                                                                                                                                                                                                                                                                                                                                                                                                                                                                                                                                                                                                                                                                                                                                                                                                                                                                                                                                                                                                                                                                                                                                                                                                                                                                                                                                                                                                                                                                                                                                                                                                                                                                                                                                                                                                                                                                                                                                                                                                                                                                                                                                                                                                                                       | Total |
|-----------------------------------------|------------------------------------------------------------------------------------------------------------------------------------------------------------------------------------------------------------------------------------------------------------------------------------------------------------------------------------------------------------------------------------------------------------------------------------------------------------------------------------------------------------------------------------------------------------------------------------------------------------------------------------------------------------------------------------------------------------------------------------------------------------------------------------------------------------------------------------------------------------------------------------------------------------------------------------------------------------------------------------------------------------------------------------------------------------------------------------------------------------------------------------------------------------------------------------------------------------------------------------------------------------------------------------------------------------------------------------------------------------------------------------------------------------------------------------------------------------------------------------------------------------------------------------------------------------------------------------------------------------------------------------------------------------------------------------------------------------------------------------------------------------------------------------------------------------------------------------------------------------------------------------------------------------------------------------------------------------------------------------------------------------------------------------------------------------------------------------------------------------------------------------------------------------------------------------------------------------------------------------------------------------------------------------------------------------------------------------------------------------------------------------------------------------------------------------|-------|
| Medline (OVID)<br><br>1970 – April 2019 | <p>1 "Hip Dislocation, Congenital"/ or ((hip or developmental) adj4 dysplas*).ti,ab,kw. or ((dislocation or subluxation or luxation or stable or unstable) adj3 hip).ti,ab,kw. or 'infant hip*'.ti,ab,kw. (14418)</p> <p>2 exp Infant, Newborn/ or Child, Preschool/ or (infant* or newborn* or neonat* or baby* or babies or postnatal or month*).ti,ab,kw. (2988152)</p> <p>3 1 and 2 (6824)</p> <p>4 (medial* or maor or inferomedial or ludloff*).ti,ab,kw. (137555)</p> <p>5 3 and 4 (212)</p> <p>6 limit 5 to (english language and yr="1970 -Current") (162)</p> <p>7 (exp clinical trial/ or randomized controlled trial/ or exp clinical trials as topic/ or randomized controlled trials as topic/ or Random Allocation/ or Double-Blind Method/ or Single-Blind Method/ or (clinical trial, phase i or clinical trial, phase ii or clinical trial, phase iii or clinical trial, phase iv or controlled clinical trial or randomized controlled trial or multicenter study or clinical trial).pt. or random*.ti,ab. or (clinic* adj trial*).tw. or ((singl* or doubl* or treb* or tripl*) adj (blind\$3 or mask\$3)).tw. or Placebos/ or placebo*.tw.) not (animals/ not humans/) (1851661)</p> <p>8 (meta-analysis/ or meta-analysis as topic/ or (meta adj analy\$).tw. or ((systematic* or literature) adj2 review\$1).tw. or (systematic adj overview\$1).tw. or exp "Review Literature as Topic"/ or cochrane.ab. or cochrane.jw. or embase.ab. or medline.ab. or (psychlit or psyclit).ab. or (cinahl or cinhal).ab. or cancerlit.ab. or ((selection criteria or data extraction).ab. and "review"/)) not (Comment/ or Editorial/ or Letter/ or (animals/ not humans/)) (391077)</p> <p>9 Epidemiologic studies/ or case control studies/ or exp cohort studies/ or Controlled Before-After Studies/ or Case control.tw. or (cohort adj (study or studies)).tw. or Cohort analy\$.tw. or (Follow up adj (study or studies)).tw. or (observational adj (study or studies)).tw. or Longitudinal.tw. or Retrospective*.tw. or prospective*.tw. or consecutive*.tw. or Cross sectional.tw. or Cross-sectional studies/ or historically controlled study/ or interrupted time series analysis/ (Onder exp cohort studies vallen ook longitudinale, prospectieve en retrospectieve studies) (3169644)</p> <p>10 6 and 8 (3)</p> <p>11 6 and 7 (5)</p> <p>12 6 and 9 (99)</p> <p>13 10 or 11 or 12 (103)</p> <p>= 103</p> | 137   |
| Embase (Elsevier)                       | <p>('developmental dysplasia of the hip'/exp OR (('hip dysplasia'/exp OR (((hip OR developmental) NEAR/4 dysplas*):ab,ti) OR (((dislocation OR subluxation OR luxation OR stable OR unstable) NEAR/3 hip):ab,ti)) AND ('newborn'/exp OR 'infant'/exp OR infant*:ab,ti OR child*:ab,ti OR newborn*:ab,ti OR neonat*:ab,ti OR baby*:ab,ti OR babies:ab,ti OR postnatal:ab,ti OR month*:ab,ti)) OR 'infant hip*':ab,ti)</p> <p>AND (medial*:ab,ti OR maor:ab,ti OR inferomedial:ab,ti OR ludloff*:ab,ti)</p> <p>AND (english)/lim AND (1970-2019)/py NOT 'conference abstract':it</p> <p><i>Used filters:</i></p> <p><u>Systematicreviews:</u> ('meta analysis'/de OR cochrane:ab OR embase:ab OR psycinfo:ab OR cinahl:ab OR medline:ab OR ((systematic NEAR/1 (review OR overview)):ab,ti) OR ((meta</p>                                                                                                                                                                                                                                                                                                                                                                                                                                                                                                                                                                                                                                                                                                                                                                                                                                                                                                                                                                                                                                                                                                                                                                                                                                                                                                                                                                                                                                                                                                                                                                                                                            |       |

|  |                                                                                                                                                                                                                                                                                                                                                                                                                                                                                                                                                                                                                                                                                                                                                                                                                                                                                                                                                                                                                                                                                                                                                                                                                                                           |  |
|--|-----------------------------------------------------------------------------------------------------------------------------------------------------------------------------------------------------------------------------------------------------------------------------------------------------------------------------------------------------------------------------------------------------------------------------------------------------------------------------------------------------------------------------------------------------------------------------------------------------------------------------------------------------------------------------------------------------------------------------------------------------------------------------------------------------------------------------------------------------------------------------------------------------------------------------------------------------------------------------------------------------------------------------------------------------------------------------------------------------------------------------------------------------------------------------------------------------------------------------------------------------------|--|
|  | <p>NEAR/1 analy*):ab,ti) OR metaanalys*:ab,ti OR 'data extraction':ab OR cochrane:jt OR 'systematic review'/de) NOT (('animal experiment'/exp OR 'animal model'/exp OR 'nonhuman'/exp) NOT 'human'/exp)</p> <p><i>RCT's</i>: ('clinical trial'/exp OR 'randomization'/exp OR 'single blind procedure'/exp OR 'double blind procedure'/exp OR 'crossover procedure'/exp OR 'placebo'/exp OR 'prospective study'/exp OR rct:ab,ti OR random*:ab,ti OR 'single blind':ab,ti OR 'randomised controlled trial':ab,ti OR 'randomized controlled trial'/exp OR placebo*:ab,ti) NOT 'conference abstract':it</p> <p><i>Observational studies</i>: 'major clinical study'/exp OR 'clinical study'/de OR 'case control study'/de OR 'family study'/de OR 'longitudinal study'/de OR 'retrospective study'/de OR ('prospective study'/de NOT 'randomized controlled trial'/de) OR 'cohort analysis'/de OR ((cohort NEAR/1 (study OR studies)):ab,ti) OR (case:ab,ti AND ((control NEAR/1 (study OR studies)):ab,ti)) OR (follow:ab,ti AND ((up NEAR/1 (study OR studies)):ab,ti)) OR ((observational NEAR/1 (study OR studies)):ab,ti) OR ((epidemiologic NEAR/1 (study OR studies)):ab,ti) OR (('cross sectional' NEAR/1 (study OR studies)):ab,ti)</p> <p>= 83</p> |  |
|--|-----------------------------------------------------------------------------------------------------------------------------------------------------------------------------------------------------------------------------------------------------------------------------------------------------------------------------------------------------------------------------------------------------------------------------------------------------------------------------------------------------------------------------------------------------------------------------------------------------------------------------------------------------------------------------------------------------------------------------------------------------------------------------------------------------------------------------------------------------------------------------------------------------------------------------------------------------------------------------------------------------------------------------------------------------------------------------------------------------------------------------------------------------------------------------------------------------------------------------------------------------------|--|

Question 3.

| Database                               | Search terms                                                                                                                                                                                                                                                                                                                                                                                                                                                                                                                                                                                                                                                                                                                                                                                                                                                                                                                                                                                                                                                                                                                                                                                                                                                                                                                                                                                                                                                                                                                                                                                                                                                                                                                                                                                                                                                                                                                                                                                                                                                                                                                                                                                                                                                                                                                                                                                                                        | Total                                                      |
|----------------------------------------|-------------------------------------------------------------------------------------------------------------------------------------------------------------------------------------------------------------------------------------------------------------------------------------------------------------------------------------------------------------------------------------------------------------------------------------------------------------------------------------------------------------------------------------------------------------------------------------------------------------------------------------------------------------------------------------------------------------------------------------------------------------------------------------------------------------------------------------------------------------------------------------------------------------------------------------------------------------------------------------------------------------------------------------------------------------------------------------------------------------------------------------------------------------------------------------------------------------------------------------------------------------------------------------------------------------------------------------------------------------------------------------------------------------------------------------------------------------------------------------------------------------------------------------------------------------------------------------------------------------------------------------------------------------------------------------------------------------------------------------------------------------------------------------------------------------------------------------------------------------------------------------------------------------------------------------------------------------------------------------------------------------------------------------------------------------------------------------------------------------------------------------------------------------------------------------------------------------------------------------------------------------------------------------------------------------------------------------------------------------------------------------------------------------------------------------|------------------------------------------------------------|
| Medline (OVID)<br><br>1970 – July 2019 | <p>1 "Hip Dislocation, Congenital"/ or ((hip or developmental) adj4 dysplas*).ti,ab,kw. or ((dislocat* or subluxat* or luxat* or stable or unstable) adj3 hip).ti,ab,kw. or 'infant hip*'.ti,ab,kw. (15232)</p> <p>2 exp Infant, Newborn/ or Child, Preschool/ or (infant* or newborn* or neonat* or baby* or babies or postnatal or month*).ti,ab,kw. (3029980)</p> <p>3 1 and 2 (7043)</p> <p>4 (anterolateral* or anterior* or aoor).ti,ab,kw. (357024)</p> <p>5 3 and 4 (381)</p> <p>6 limit 5 to (english language and yr="1970 -Current") (309)</p> <p>7 (exp clinical trial/ or randomized controlled trial/ or exp clinical trials as topic/ or randomized controlled trials as topic/ or Random Allocation/ or Double-Blind Method/ or Single-Blind Method/ or (clinical trial, phase i or clinical trial, phase ii or clinical trial, phase iii or clinical trial, phase iv or controlled clinical trial or randomized controlled trial or multicenter study or clinical trial).pt. or random*.ti,ab. or (clinic* adj trial*).tw. or ((singl* or doubl* or treb* or tripl*) adj (blind\$3 or mask\$3)).tw. or Placebos/ or placebo*.tw.) not (animals/ not humans/) (1878527)</p> <p>8 (meta-analysis/ or meta-analysis as topic/ or (meta adj analy\$).tw. or ((systematic* or literature) adj2 review\$1).tw. or (systematic adj overview\$1).tw. or exp "Review Literature as Topic"/ or cochrane.ab. or cochrane.jw. or embase.ab. or medline.ab. or (psychlit or psyclit).ab. or (cinahl or cinhal).ab. or cancerlit.ab. or ((selection criteria or data extraction).ab. and "review"/)) not (Comment/ or Editorial/ or Letter/ or (animals/ not humans/)) (404299)</p> <p>9 Epidemiologic studies/ or case control studies/ or exp cohort studies/ or Controlled Before-After Studies/ or Case control.tw. or (cohort adj (study or studies)).tw. or Cohort analy\$.tw. or (Follow up adj (study or studies)).tw. or (observational adj (study or studies)).tw. or Longitudinal.tw. or Retrospective*.tw. or prospective*.tw. or consecutive*.tw. or Cross sectional.tw. or Cross-sectional studies/ or historically controlled study/ or interrupted time series analysis/ (Onder exp cohort studies vallen ook longitudinale, prospectieve en retrospectieve studies) (3225350)</p> <p>10 6 and 8 (8)</p> <p>11 6 and 7 (19)</p> <p>12 6 and 9 (157)</p> <p>13 10 or 11 or 12 (166)</p> <p>= 166 (165 unique)</p> | <p><b>230</b></p> <p>(after removing duplicates = 210)</p> |
| Embase (Elsevier)                      | <p>('developmental dysplasia of the hip'/exp OR (('hip dysplasia'/exp OR (((hip OR developmental) NEAR/4 dysplas*):ab,ti) OR (((dislocat* OR subluxat* OR luxat* OR stable OR unstable) NEAR/3 hip):ab,ti)) AND ('newborn'/exp OR 'infant'/exp OR infant*:ab,ti OR child*:ab,ti OR newborn*:ab,ti OR neonat*:ab,ti OR baby*:ab,ti OR babies:ab,ti OR postnatal:ab,ti OR month*:ab,ti)) OR 'infant hip*':ab,ti)</p> <p>AND ('anterolateral approach'/exp OR anterolateral*:ab,ti OR anterior*:ab,ti OR aoor:ab,ti)</p>                                                                                                                                                                                                                                                                                                                                                                                                                                                                                                                                                                                                                                                                                                                                                                                                                                                                                                                                                                                                                                                                                                                                                                                                                                                                                                                                                                                                                                                                                                                                                                                                                                                                                                                                                                                                                                                                                                               |                                                            |

|  |                                                                                                                                                                                                                                                                                                                                                                                                                                                                                                                                                                                                                                                                                                                                                                                                                                                                                                                                                                                                                                                                                                                                                                                                                                                                                                                                                                                                                                                                                                                                                                 |  |
|--|-----------------------------------------------------------------------------------------------------------------------------------------------------------------------------------------------------------------------------------------------------------------------------------------------------------------------------------------------------------------------------------------------------------------------------------------------------------------------------------------------------------------------------------------------------------------------------------------------------------------------------------------------------------------------------------------------------------------------------------------------------------------------------------------------------------------------------------------------------------------------------------------------------------------------------------------------------------------------------------------------------------------------------------------------------------------------------------------------------------------------------------------------------------------------------------------------------------------------------------------------------------------------------------------------------------------------------------------------------------------------------------------------------------------------------------------------------------------------------------------------------------------------------------------------------------------|--|
|  | <p>AND (english)/lim AND (1970-2019)/py NOT 'conference abstract':it</p> <p><i>Used filters:</i></p> <p><u>Systematic reviews:</u> ('meta analysis'/de OR cochrane:ab OR embase:ab OR psycinfo:ab OR cinahl:ab OR medline:ab OR ((systematic NEAR/1 (review OR overview)):ab,ti) OR ((meta NEAR/1 analy*):ab,ti) OR metaanalys*:ab,ti OR 'data extraction':ab OR cochrane:jt OR 'systematic review'/de) NOT (('animal experiment'/exp OR 'animal model'/exp OR 'nonhuman'/exp) NOT 'human'/exp)</p> <p><u>RCT's:</u> ('clinical trial'/exp OR 'randomization'/exp OR 'single blind procedure'/exp OR 'double blind procedure'/exp OR 'crossover procedure'/exp OR 'placebo'/exp OR 'prospective study'/exp OR rct:ab,ti OR random*:ab,ti OR 'single blind':ab,ti OR 'randomised controlled trial':ab,ti OR 'randomized controlled trial'/exp OR placebo*:ab,ti) NOT 'conference abstract':it</p> <p><u>Observational studies:</u> 'major clinical study'/exp OR 'clinical study'/de OR 'case control study'/de OR 'family study'/de OR 'longitudinal study'/de OR 'retrospective study'/de OR ('prospective study'/de NOT 'randomized controlled trial'/de) OR 'cohort analysis'/de OR ((cohort NEAR/1 (study OR studies)):ab,ti) OR (case:ab,ti AND ((control NEAR/1 (study OR studies)):ab,ti)) OR (follow:ab,ti AND ((up NEAR/1 (study OR studies)):ab,ti)) OR ((observational NEAR/1 (study OR studies)):ab,ti) OR ((epidemiologic NEAR/1 (study OR studies)):ab,ti) OR (('cross sectional' NEAR/1 (study OR studies)):ab,ti)</p> <p>= 149 (148 unique)</p> |  |
|--|-----------------------------------------------------------------------------------------------------------------------------------------------------------------------------------------------------------------------------------------------------------------------------------------------------------------------------------------------------------------------------------------------------------------------------------------------------------------------------------------------------------------------------------------------------------------------------------------------------------------------------------------------------------------------------------------------------------------------------------------------------------------------------------------------------------------------------------------------------------------------------------------------------------------------------------------------------------------------------------------------------------------------------------------------------------------------------------------------------------------------------------------------------------------------------------------------------------------------------------------------------------------------------------------------------------------------------------------------------------------------------------------------------------------------------------------------------------------------------------------------------------------------------------------------------------------|--|

Question 4 and 6.

| Database          | Search terms                                                                                                                                                                                                                                                                                                                                                                                                                                                                                                                                                                                                               | Total |
|-------------------|----------------------------------------------------------------------------------------------------------------------------------------------------------------------------------------------------------------------------------------------------------------------------------------------------------------------------------------------------------------------------------------------------------------------------------------------------------------------------------------------------------------------------------------------------------------------------------------------------------------------------|-------|
| Medline (OVID)    | 1 "Hip Dislocation, Congenital"/ or ((hip or developmental) adj4 dysplas*).ti,ab,kw. or ((dislocation or subluxation or luxation or stable or unstable) adj3 hip).ti,ab,kw. or 'infant hip*'.ti,ab,kw. (14444)                                                                                                                                                                                                                                                                                                                                                                                                             | 191   |
| 1970 – May 2019   | 2 exp Infant, Newborn/ or (infant* or newborn* or neonat* or baby* or babies or postnatal or month*).ti,ab,kw. (2408207)                                                                                                                                                                                                                                                                                                                                                                                                                                                                                                   |       |
|                   | 3 1 and 2 (5055)                                                                                                                                                                                                                                                                                                                                                                                                                                                                                                                                                                                                           |       |
|                   | 4 exp Casts, Surgical/ or (cast* or spicacast* or 'spica cast*' or immobili*).ti,ab,kw. (210838)                                                                                                                                                                                                                                                                                                                                                                                                                                                                                                                           |       |
|                   | 5 3 and 4 (338)                                                                                                                                                                                                                                                                                                                                                                                                                                                                                                                                                                                                            |       |
|                   | 6 limit 5 to (english language and yr="1970 -Current") (240)                                                                                                                                                                                                                                                                                                                                                                                                                                                                                                                                                               |       |
|                   | 7 (exp clinical trial/ or randomized controlled trial/ or exp clinical trials as topic/ or randomized controlled trials as topic/ or Random Allocation/ or Double-Blind Method/ or Single-Blind Method/ or (clinical trial, phase i or clinical trial, phase ii or clinical trial, phase iii or clinical trial, phase iv or controlled clinical trial or randomized controlled trial or multicenter study or clinical trial).pt. or random*.ti,ab. or (clinic* adj trial*).tw. or ((singl* or doubl* or treb* or tripl*) adj (blind\$3 or mask\$3)).tw. or Placebos/ or placebo*.tw.) not (animals/ not humans/) (1856761) |       |
|                   | 8 (meta-analysis/ or meta-analysis as topic/ or (meta adj analy\$).tw. or ((systematic* or literature) adj2 review\$1).tw. or (systematic adj overview\$1).tw. or exp "Review Literature as Topic"/ or cochrane.ab. or cochrane.jw. or embase.ab. or medline.ab. or (psychlit or psyclit).ab. or (cinahl or cinhal).ab. or cancerlit.ab. or ((selection criteria or data extraction).ab. and "review"/)) not (Comment/ or Editorial/ or Letter/ or (animals/ not humans/)) (393139)                                                                                                                                        |       |
|                   | 9 Epidemiologic studies/ or case control studies/ or exp cohort studies/ or Controlled Before-After Studies/ or Case control.tw. or (cohort adj (study or studies)).tw. or Cohort analy\$.tw. or (Follow up adj (study or studies)).tw. or (observational adj (study or studies)).tw. or Longitudinal.tw. or Retrospective*.tw. or prospective*.tw. or consecutive*.tw. or Cross sectional.tw. or Cross-sectional studies/ or historically controlled study/ or interrupted time series analysis/ (Onder exp cohort studies vallen ook longitudinale, prospectieve en retrospectieve studies) (3179970)                    |       |
|                   | 10 6 and 8 (2)                                                                                                                                                                                                                                                                                                                                                                                                                                                                                                                                                                                                             |       |
|                   | 11 6 and 7 (6)                                                                                                                                                                                                                                                                                                                                                                                                                                                                                                                                                                                                             |       |
|                   | 12 6 and 9 (121)                                                                                                                                                                                                                                                                                                                                                                                                                                                                                                                                                                                                           |       |
|                   | 13 10 or 11 or 12 (124)                                                                                                                                                                                                                                                                                                                                                                                                                                                                                                                                                                                                    |       |
|                   | = 124 (124 unique)                                                                                                                                                                                                                                                                                                                                                                                                                                                                                                                                                                                                         |       |
| Embase (Elsevier) | ('developmental dysplasia of the hip'/exp OR (('hip dysplasia'/exp OR (((hip OR developmental) NEAR/4 dysplas*):ab,ti) OR (((dislocation OR subluxation OR luxation OR stable OR unstable) NEAR/3 hip):ab,ti)) AND ('child'/exp OR 'newborn'/exp OR 'infant'/exp OR child*:ab,ti OR infant*:ab,ti OR newborn*:ab,ti OR neonat*:ab,ti OR baby*:ab,ti OR                                                                                                                                                                                                                                                                     |       |

|  |                                                                                                                                                                                                                                                                                                                                                                                                                                                                                                                                                                                                                                                                                                                                                                                                                                                                                                                                                                                                                                                                                                                                                                                                                                                                                                                                                                                                                                                                                                                                                                                                                                                                                                                                                                                                               |  |
|--|---------------------------------------------------------------------------------------------------------------------------------------------------------------------------------------------------------------------------------------------------------------------------------------------------------------------------------------------------------------------------------------------------------------------------------------------------------------------------------------------------------------------------------------------------------------------------------------------------------------------------------------------------------------------------------------------------------------------------------------------------------------------------------------------------------------------------------------------------------------------------------------------------------------------------------------------------------------------------------------------------------------------------------------------------------------------------------------------------------------------------------------------------------------------------------------------------------------------------------------------------------------------------------------------------------------------------------------------------------------------------------------------------------------------------------------------------------------------------------------------------------------------------------------------------------------------------------------------------------------------------------------------------------------------------------------------------------------------------------------------------------------------------------------------------------------|--|
|  | <p>babies:ab,ti OR postnatal:ab,ti OR month*:ab,ti)) OR 'infant hip*':ab,ti)</p> <p>AND ('cast application'/exp OR 'orthopedic cast'/exp OR 'hip spica'/exp OR cast*:ab,ti OR spicacast*:ab,ti OR 'spica cast*':ab,ti OR immobili*:ab,ti)</p> <p>AND (english)/lim AND (1970-2019)/py NOT 'conference abstract':it</p> <p><i>Used filters:</i></p> <p><u>Systematic reviews:</u> ('meta analysis'/de OR cochrane:ab OR embase:ab OR psycinfo:ab OR cinahl:ab OR medline:ab OR ((systematic NEAR/1 (review OR overview)):ab,ti) OR ((meta NEAR/1 analy*):ab,ti) OR metaanalys*:ab,ti OR 'data extraction':ab OR cochrane:jt OR 'systematic review'/de) NOT (('animal experiment'/exp OR 'animal model'/exp OR 'nonhuman'/exp) NOT 'human'/exp)</p> <p><u>RCT's:</u> ('clinical trial'/exp OR 'randomization'/exp OR 'single blind procedure'/exp OR 'double blind procedure'/exp OR 'crossover procedure'/exp OR 'placebo'/exp OR 'prospective study'/exp OR rct:ab,ti OR random*:ab,ti OR 'single blind':ab,ti OR 'randomised controlled trial':ab,ti OR 'randomized controlled trial'/exp OR placebo*:ab,ti) NOT 'conference abstract':it</p> <p><u>Observational studies:</u> 'major clinical study'/exp OR 'clinical study'/de OR 'case control study'/de OR 'family study'/de OR 'longitudinal study'/de OR 'retrospective study'/de OR ('prospective study'/de NOT 'randomized controlled trial'/de) OR 'cohort analysis'/de OR ((cohort NEAR/1 (study OR studies)):ab,ti) OR (case:ab,ti AND ((control NEAR/1 (study OR studies)):ab,ti)) OR (follow:ab,ti AND ((up NEAR/1 (study OR studies)):ab,ti)) OR ((observational NEAR/1 (study OR studies)):ab,ti) OR ((epidemiologic NEAR/1 (study OR studies)):ab,ti) OR (('cross sectional' NEAR/1 (study OR studies)):ab,ti)</p> <p>= 130 (128 unique)</p> |  |
|--|---------------------------------------------------------------------------------------------------------------------------------------------------------------------------------------------------------------------------------------------------------------------------------------------------------------------------------------------------------------------------------------------------------------------------------------------------------------------------------------------------------------------------------------------------------------------------------------------------------------------------------------------------------------------------------------------------------------------------------------------------------------------------------------------------------------------------------------------------------------------------------------------------------------------------------------------------------------------------------------------------------------------------------------------------------------------------------------------------------------------------------------------------------------------------------------------------------------------------------------------------------------------------------------------------------------------------------------------------------------------------------------------------------------------------------------------------------------------------------------------------------------------------------------------------------------------------------------------------------------------------------------------------------------------------------------------------------------------------------------------------------------------------------------------------------------|--|

Question 5.

| Database            | Search terms                                                                                                                                                                                                                                                                                                                                                                                                                                                                                                                                                                                                               | Total |
|---------------------|----------------------------------------------------------------------------------------------------------------------------------------------------------------------------------------------------------------------------------------------------------------------------------------------------------------------------------------------------------------------------------------------------------------------------------------------------------------------------------------------------------------------------------------------------------------------------------------------------------------------------|-------|
| Medline (OVID)      | 1 "Hip Dislocation, Congenital"/ or ((hip or developmental) adj4 dysplas*).ti,ab,kw. or ((dislocation or reposition or subluxation or luxation or stable or unstable) adj3 hip).ti,ab,kw. or 'infant hip*'.ti,ab,kw. (14731)                                                                                                                                                                                                                                                                                                                                                                                               | 132   |
| 1970 – October 2019 | 2 exp Infant, Newborn/ or (infant* or newborn* or neonat* or baby* or babies or postnatal or month*).ti,ab,kw. (2467781)                                                                                                                                                                                                                                                                                                                                                                                                                                                                                                   |       |
|                     | 3 1 and 2 (5139)                                                                                                                                                                                                                                                                                                                                                                                                                                                                                                                                                                                                           |       |
|                     | 4 exp Casts, Surgical/ or (cast* or spicacast* or 'spica cast*' or immobili*).ti,ab,kw. (215633)                                                                                                                                                                                                                                                                                                                                                                                                                                                                                                                           |       |
|                     | 5 3 and 4 (341)                                                                                                                                                                                                                                                                                                                                                                                                                                                                                                                                                                                                            |       |
|                     | 6 limit 5 to (english language and yr="1980 -Current") (223)                                                                                                                                                                                                                                                                                                                                                                                                                                                                                                                                                               |       |
|                     | 7 (exp clinical trial/ or randomized controlled trial/ or exp clinical trials as topic/ or randomized controlled trials as topic/ or Random Allocation/ or Double-Blind Method/ or Single-Blind Method/ or (clinical trial, phase i or clinical trial, phase ii or clinical trial, phase iii or clinical trial, phase iv or controlled clinical trial or randomized controlled trial or multicenter study or clinical trial).pt. or random*.ti,ab. or (clinic* adj trial*).tw. or ((singl* or doubl* or treb* or tripl*) adj (blind\$3 or mask\$3)).tw. or Placebos/ or placebo*.tw.) not (animals/ not humans/) (1905031) |       |
|                     | 8 (meta-analysis/ or meta-analysis as topic/ or (meta adj analy\$).tw. or ((systematic* or literature) adj2 review\$1).tw. or (systematic adj overview\$1).tw. or exp "Review Literature as Topic"/ or cochrane.ab. or cochrane.jw. or embase.ab. or medline.ab. or (psychlit or psyclit).ab. or (cinahl or cinhal).ab. or cancerlit.ab. or ((selection criteria or data extraction).ab. and "review"/)) not (Comment/ or Editorial/ or Letter/ or (animals/ not humans/)) (414964)                                                                                                                                        |       |
|                     | 9 Epidemiologic studies/ or case control studies/ or exp cohort studies/ or Controlled Before-After Studies/ or Case control.tw. or (cohort adj (study or studies)).tw. or Cohort analy\$.tw. or (Follow up adj (study or studies)).tw. or (observational adj (study or studies)).tw. or Longitudinal.tw. or Retrospective*.tw. or prospective*.tw. or consecutive*.tw. or Cross sectional.tw. or Cross-sectional studies/ or historically controlled study/ or interrupted time series analysis/ [Onder exp cohort studies vallen ook longitudinale, prospectieve en retrospectieve studies] (3279521)                    |       |
|                     | 10 6 and 8 (2)                                                                                                                                                                                                                                                                                                                                                                                                                                                                                                                                                                                                             |       |
|                     | 11 6 and 7 (5)                                                                                                                                                                                                                                                                                                                                                                                                                                                                                                                                                                                                             |       |

|                              |                                                                                                                                                                                                                                                                                                                                                                                                                                                                                                                                                                                                                                                                                                                                                                                                                                                                                                                                                                                                                                                                                                                                                                                                                                                                                                                                                                                                                                                                                                                                                                                                                                                                                                                                                                                                                                                                                                                                                                                                                                                                                                                                                                                                                                                                                                                                                                                                                                                                                                                                                                                                                                                                                                                            |  |
|------------------------------|----------------------------------------------------------------------------------------------------------------------------------------------------------------------------------------------------------------------------------------------------------------------------------------------------------------------------------------------------------------------------------------------------------------------------------------------------------------------------------------------------------------------------------------------------------------------------------------------------------------------------------------------------------------------------------------------------------------------------------------------------------------------------------------------------------------------------------------------------------------------------------------------------------------------------------------------------------------------------------------------------------------------------------------------------------------------------------------------------------------------------------------------------------------------------------------------------------------------------------------------------------------------------------------------------------------------------------------------------------------------------------------------------------------------------------------------------------------------------------------------------------------------------------------------------------------------------------------------------------------------------------------------------------------------------------------------------------------------------------------------------------------------------------------------------------------------------------------------------------------------------------------------------------------------------------------------------------------------------------------------------------------------------------------------------------------------------------------------------------------------------------------------------------------------------------------------------------------------------------------------------------------------------------------------------------------------------------------------------------------------------------------------------------------------------------------------------------------------------------------------------------------------------------------------------------------------------------------------------------------------------------------------------------------------------------------------------------------------------|--|
|                              | <p>12 6 and 9 (117)<br/> 13 10 or 11 or 12 (119)<br/> 14 exp Tomography, X-Ray Computed/ (413232)<br/> 15 exp Magnetic Resonance Imaging/ (431836)<br/> 16 exp Ultrasonography/ (423063)<br/> 17 exp Arthrography/ (4967)<br/> 18 ('cat scan*' or 'computed tomographic scan' or 'computed tomography' or 'computer assisted tomography' or 'computer tomography' or 'computerised axial tomography' or 'computerised tomography' or 'computerized axial tomography' or 'computerized tomography' or 'computerized tomography scan' or 'expert plus' or 'expert plus 1t' or 'mri' or 'nmr imaging' or 'magnetic resonance imaging' or 'magnetic resonance tomography' or 'magnetization transfer imaging' or 'mr imaging' or 'doptone' or 'echogram' or 'echography' or 'echoscopy' or 'echosound' or 'sonogram' or 'sonograph*' or 'ultrasonic detection' or 'ultrasonic diagnosis' or 'ultrasonic echo' or 'ultrasonic examination*' or 'ultrasonic scanning' or 'ultrasonic scintillation' or 'ultrasonograph*' or 'ultrasound' or 'arthrogram*' or 'arthrograph*' or ultrascop* or roentgen* or rontgen*).ti,ab,kw. (945292)<br/> 19 14 or 15 or 16 or 17 or 18 (1519032)<br/> 20 13 and 19 (44)<br/> 21 7 and 20 (2)<br/> 22 8 and 20 (2)<br/> 23 9 and 20 (42)<br/> 24 6 and 19 (87)</p>                                                                                                                                                                                                                                                                                                                                                                                                                                                                                                                                                                                                                                                                                                                                                                                                                                                                                                                                                                                                                                                                                                                                                                                                                                                                                                                                                                                                                             |  |
| <p>Embase<br/>(Elsevier)</p> | <p>1 'developmental dysplasia of the hip'/exp OR (('hip dysplasia'/exp OR (((hip OR developmental) NEAR/4 dysplas*):ab,ti) OR (((dislocation OR subluxation OR luxation OR stable OR unstable OR relocation) NEAR/3 hip):ab,ti)) AND ('newborn'/exp OR 'infant'/exp OR infant*:ab,ti OR newborn*:ab,ti OR neonat*:ab,ti OR baby*:ab,ti OR babies:ab,ti OR postnatal:ab,ti)) OR 'infant hip*':ab,ti</p> <p>2 imaging' OR 'nuclear magnetic resonance imaging' OR 'arthrography'/exp OR 'arthrogram':ti,ab OR 'arthrography':ti,ab OR 'echography'/exp OR 'doptone':ti,ab OR 'duplex echography':ti,ab OR 'echogram':ti,ab OR 'echography':ti,ab OR 'echoscopy':ti,ab OR 'echosound':ti,ab OR 'high resolution echography':ti,ab OR 'scanning, ultrasonic':ti,ab OR 'sonogram':ti,ab OR 'sonography':ti,ab OR 'ultrasonic detection':ti,ab OR 'ultrasonic echo':ti,ab OR 'ultrasonic examination':ti,ab OR 'ultrasonic scanning':ti,ab OR 'ultrasonic scintillation':ti,ab OR 'ultrasonography':ti,ab OR 'ultrasound scanning':ti,ab OR 'ultrasound':ti,ab OR ultrascop*:ti,ab OR radiograph*:ti,ab OR roentgen:ti,ab OR rontgen:ti,ab</p> <p>3 #1 AND #2</p> <p>4 'orthopedic cast'/exp OR 'body cast' OR 'orthopaedic cast' OR 'orthopedic cast' OR 'surgical cast' OR 'pavlik harness'/exp OR 'pavlik':ti,ab</p> <p>5 #3 AND #4</p> <p>6 #5 AND [1-1-1980]/sd</p> <p>7 #6 AND [english]/lim NOT 'conference abstract':it</p> <p>8 ('meta analysis'/de OR cochrane:ab OR embase:ab OR psycinfo:ab OR cinahl:ab OR medline:ab OR ((systematic NEAR/1 (review OR overview)):ab,ti) OR ((meta NEAR/1 analy*):ab,ti) OR metaanalys*:ab,ti OR 'data extraction':ab OR cochrane:jt OR 'systematic review'/de) NOT (('animal experiment'/exp OR 'animal model'/exp OR 'nonhuman'/exp) NOT 'human'/exp)</p> <p>9 ('clinical trial'/exp OR 'randomization'/exp OR 'single blind procedure'/exp OR 'double blind procedure'/exp OR 'crossover procedure'/exp OR 'placebo'/exp OR 'prospective study'/exp OR rct:ab,ti OR random*:ab,ti OR 'single blind':ab,ti OR 'randomised controlled trial':ab,ti OR 'randomized controlled trial'/exp OR placebo*:ab,ti) NOT 'conference abstract':it</p> <p>10 'major clinical study'/de OR 'clinical study'/de OR 'case control study'/de OR 'family study'/de OR 'longitudinal study'/de OR 'retrospective study'/de OR 'prospective study'/de OR 'cohort analysis'/de OR ((cohort NEAR/1 (study OR studies)):ab,ti) OR (('case control' NEAR/1 (study OR studies)):ab,ti) OR (('follow up' NEAR/1 (study OR studies)):ab,ti) OR (observational NEAR/1 (study OR studies)) OR ((epidemiologic NEAR/1 (study OR studies)):ab,ti) OR (('cross sectional' NEAR/1 (study OR studies)):ab,ti)</p> |  |

|  |               |  |
|--|---------------|--|
|  | 11 #7 AND #8  |  |
|  | 12 #7 AND #9  |  |
|  | 13 #7 AND #10 |  |
